# Supplementary material for: Calcium Binds to Transthyretin with Low Affinity
Source: MDPI journal article supplement (doi:10.3390/biom12081066), 2022-08-02
Supplement: s1 [file s1]

# Calcium Binds to Transthyretin with Low Affinity

**Cristina Cantarutti** <sup>1,2</sup>, **Maria Chiara Mimmi** <sup>3</sup>, **Guglielmo Verona** <sup>4</sup>, **Walter Mandaliti** <sup>1</sup>, **Graham W. Taylor** <sup>4</sup>,  
**P. Patrizia Mangione** <sup>3,4</sup>, **Sofia Giorgetti** <sup>2,3</sup>, **Vittorio Bellotti** <sup>2,4,5</sup> and **Alessandra Corazza** <sup>1,2,\*</sup>

<sup>1</sup> Department of Medicine, University of Udine, 33100 Udine, Italy; cristina.cantarutti@uniud.it (C.C.); walter.mandaliti@uniud.it (W.M.)

<sup>2</sup> Istituto Nazionale Biostrutture e Biosistemi, 0013 Rome, Italy; sofia.giorgetti@unipv.it (S.G.); v.bellotti@ucl.ac.uk (V.B.)

<sup>3</sup> Department of Molecular Medicine, Institute of Biochemistry, University of Pavia, 27100 Pavia, Italy; chiara.mimmi@unipv.it (M.C.M.), palma.mangione@unipv.it (P.P.M.)

<sup>4</sup> Wolfson Drug Discovery Unit, Centre for Amyloidosis and Acute Phase Proteins, Division of Medicine, University College London, NW3 2PF London, UK; g.verona@ucl.ac.uk (G.V.); graham.taylor@ucl.ac.uk (G.W.T.)

<sup>5</sup> Scientific Direction, Fondazione IRCCS Policlinico San Matteo, 27100 Pavia, Italy

\* Correspondence: alessandra.corazza@uniud.it

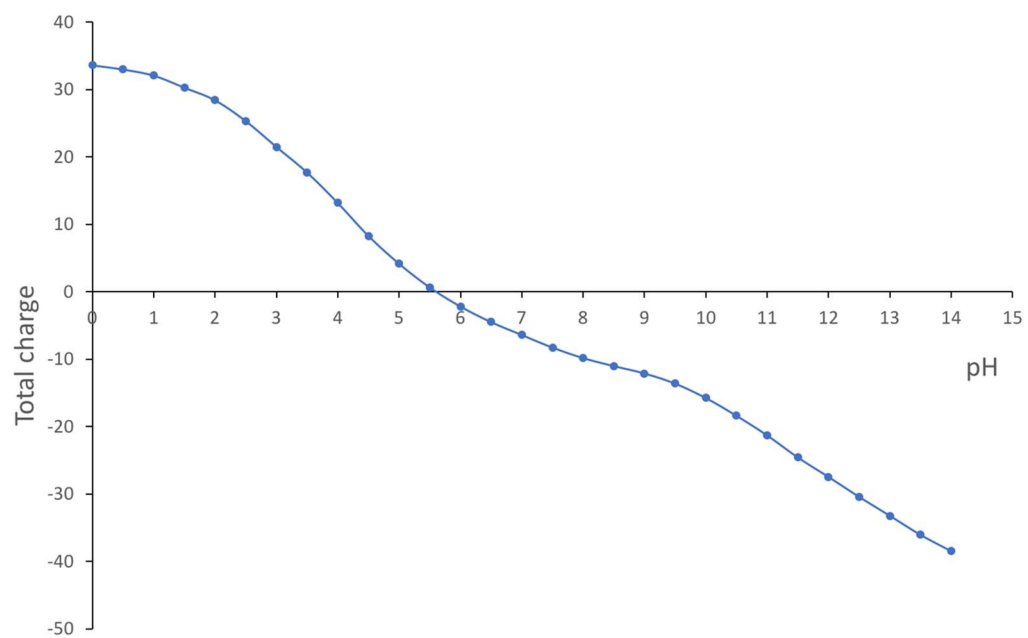

**Figure S1.** TTR charge as a function of pH.

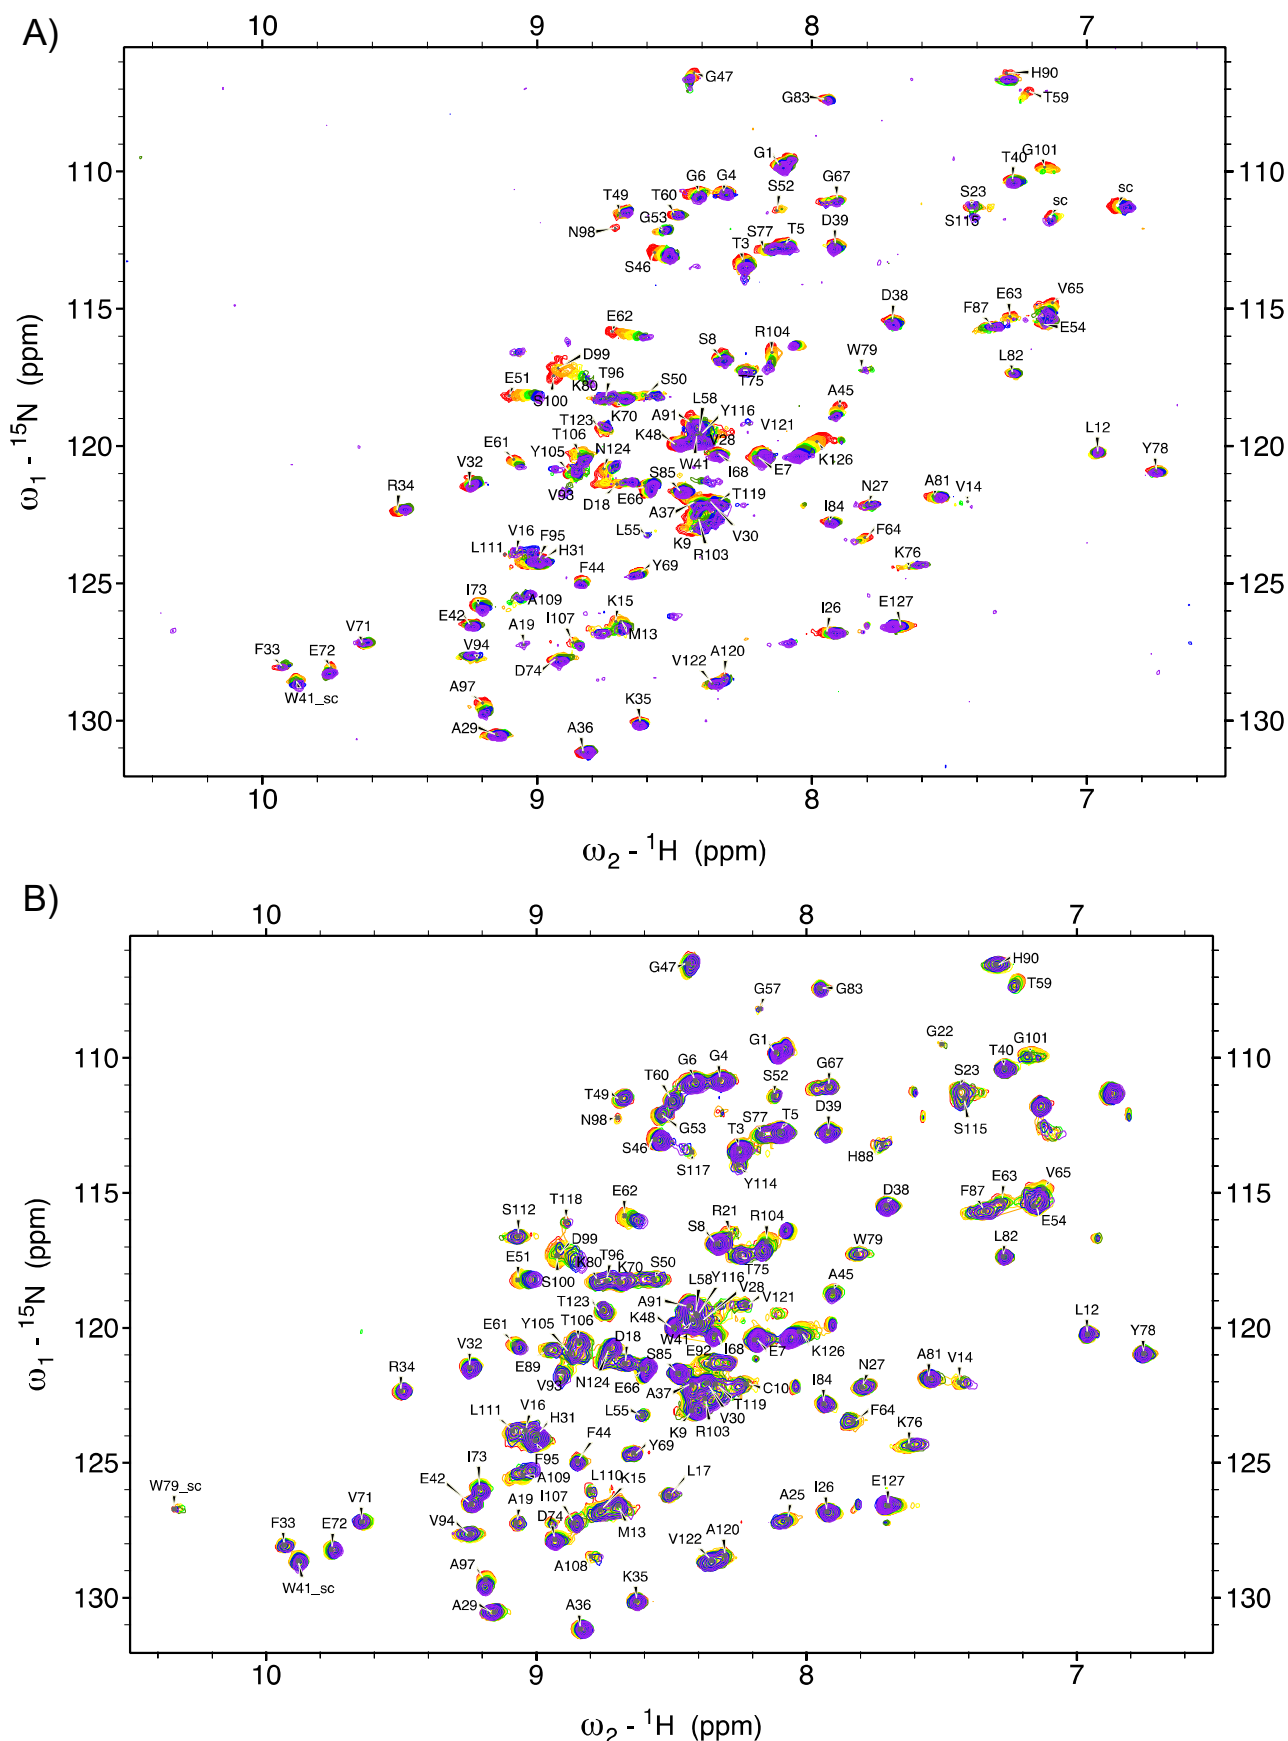

**Figure S2.** Overlay of 2D [ $^1\text{H}$ ,  $^{15}\text{N}$ ] TROSY spectra of TTR acquired at 700 MHz recorded at increasing calcium concentration at pH 7.4 without (A) and with 154 mM NaCl (B). The color code for panel A is: 0mM red, 5 mM orange, 10mM yellow, 20mM green, 40mM blue, 60mM purple. The color code for panel B is: 0 mM red, 1.3 mM orange, 4.6 mM gold, 7.9 mM yellow, 14.5 mM green, 24.3 mM chartreuse green, 37.3 mM blue and 62.7 mM purple.

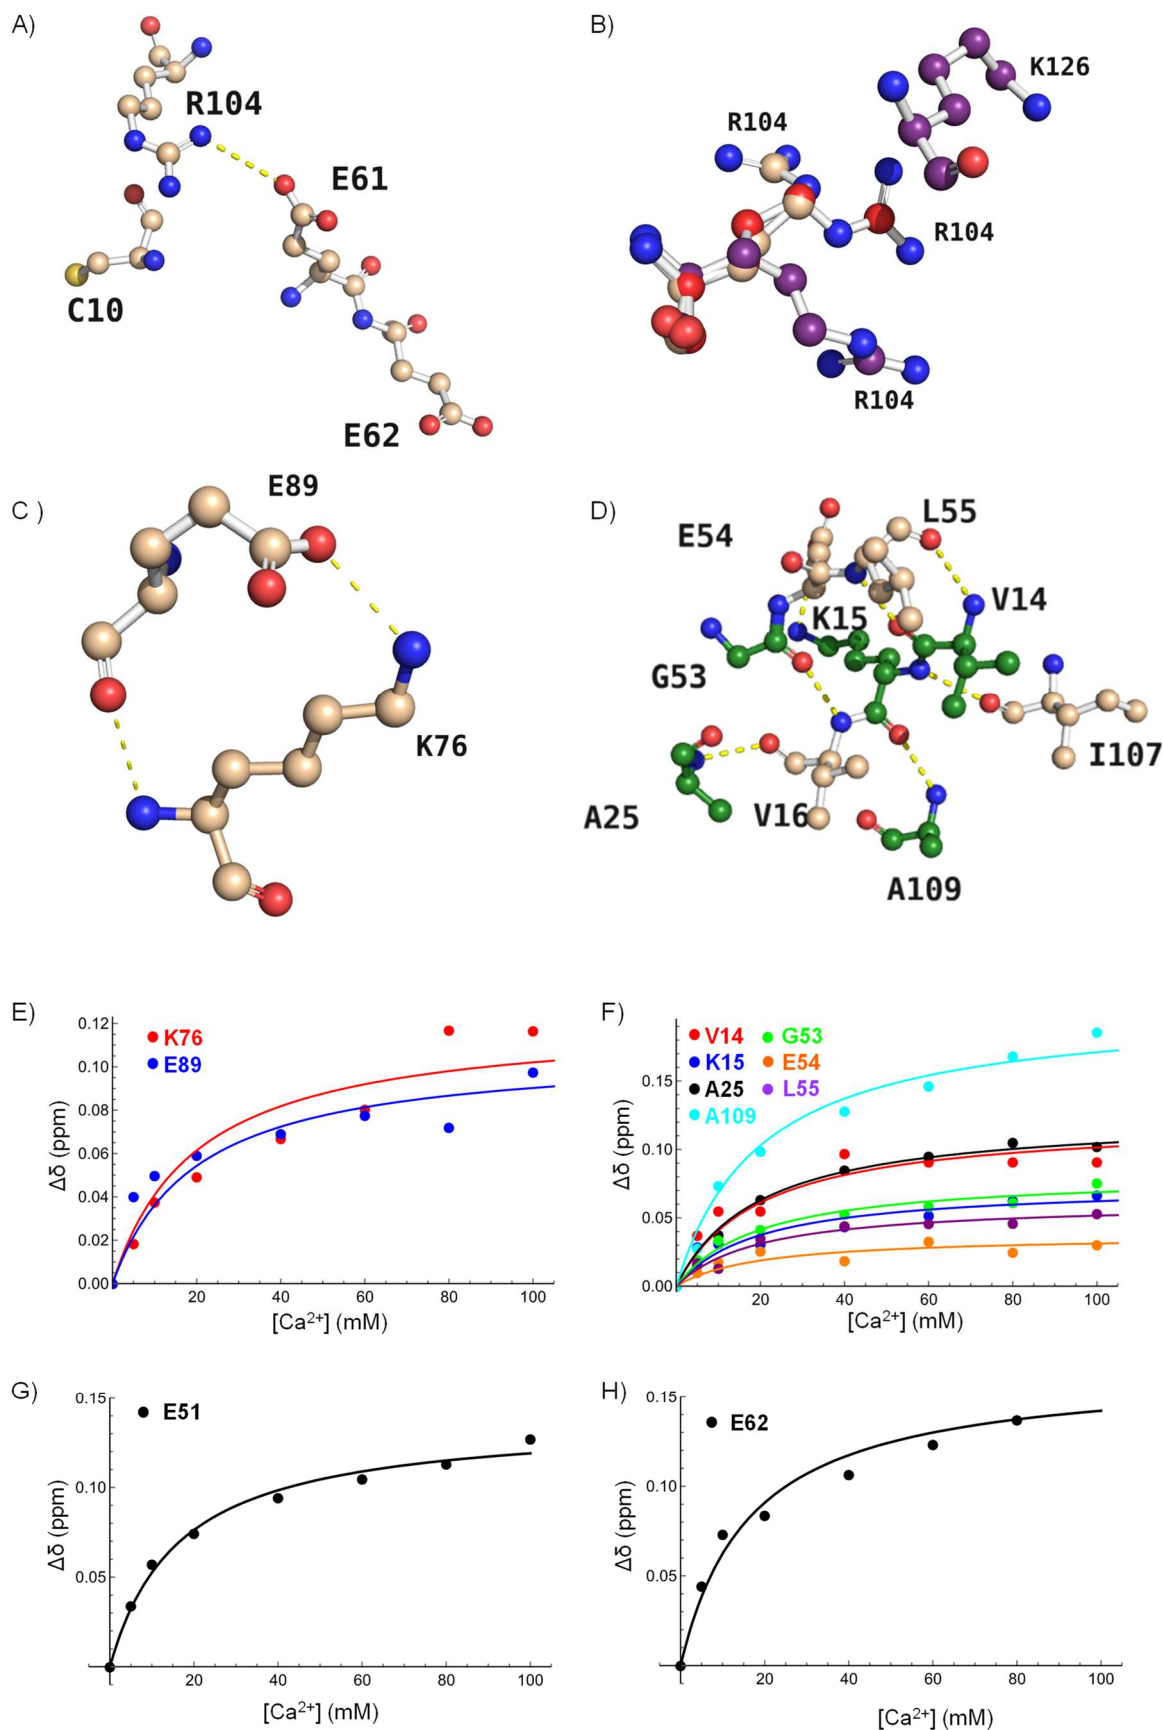

**Figure S3.** (A) C10, R104 and E61 residues taken from 5CN3 TTR structure. (B) Position of R104 side chain with respect to K126 in 5CN3 (beige), 1TTA (purple) and 4N85 (red) structures. (C) H bonds between E89 and K76 in 5CN3 structure. (D) H bond network in 5CN3 structure connecting significantly shifting residues in presence of calcium (coloured in green). (E-H) Chemical shift perturbation as a function of  $\text{Ca}^{2+}$  concentration recorded at pH 6.5 and fitted with equation [1] (see main text) for residues with  $\Delta\delta \geq$  average  $+2\sigma$  belonging to putative sites 3-6.

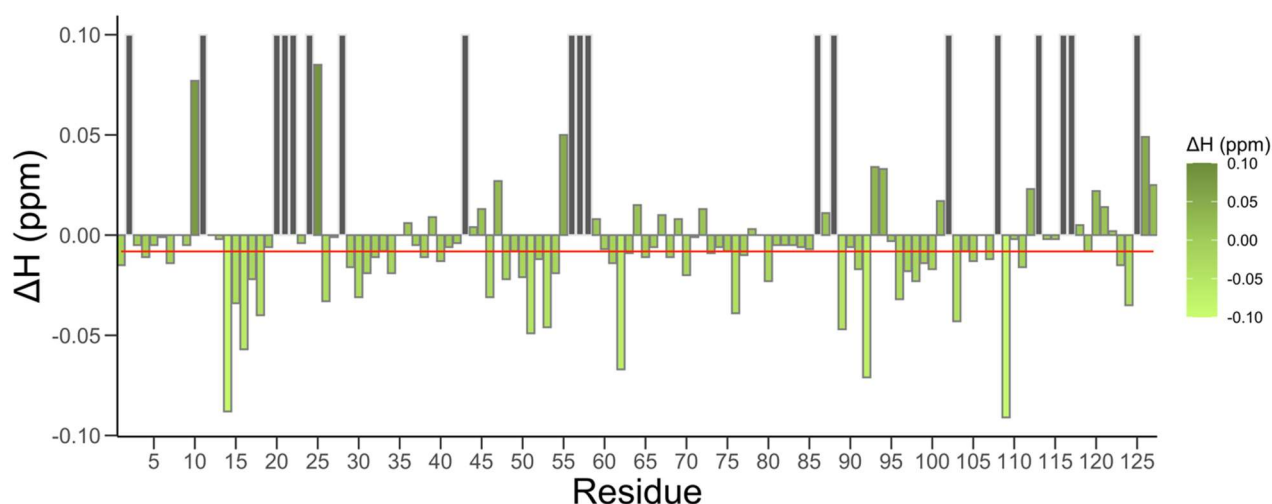

**Figure S4.** Bar plot of TTR  $H^N$  chemical shift variation with 150 mM NaCl. Gray bars indicate prolines and residues that could not be followed during titration. The  $H^N$  chemical shift variation observed in the presence of NaCl is depicted in a light-dark green gradient. The red line corresponds to the average value.

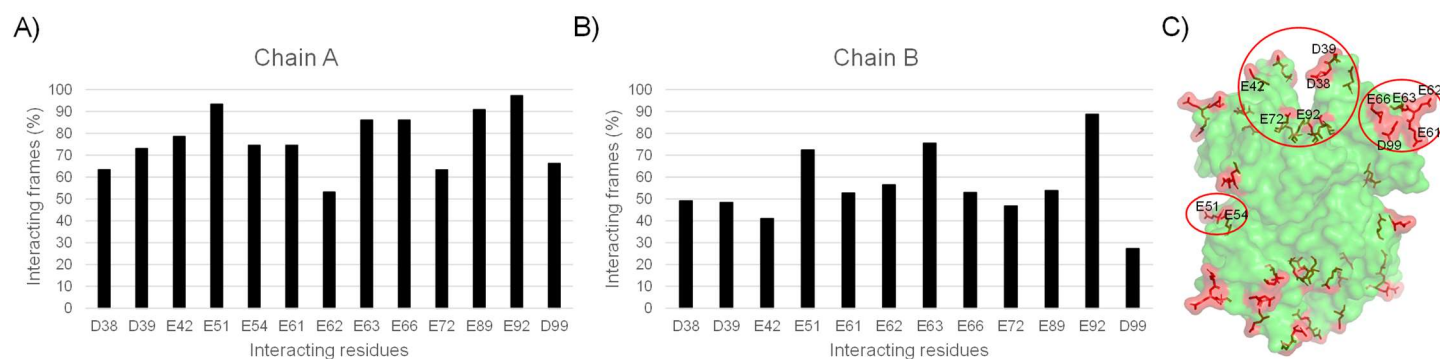

**Figure S5.** Persistency of electrostatic interactions between  $Ca^{2+}$  and TTR residues obtained from 15 ns MD simulations for protein chain A (A) and chain B (B). (C) The interacting residues are coloured in red on the protein structure (pdb: 5cn3) and the three interacting patches are highlighted by red circles.
